# Supplementary material for: Detection and imaging of fatty plaques in blood vessels using functionalized carbon dots
Source: Royal Society of Chemistry journal article supplement (doi:10.1039/c5ay02389k), 2015-01-01
Supplement: c5ay02389k1.pdf [file c5ay02389k1.pdf]

## Supplementary information

### Detection and imaging of fatty plaques on blood vessels using functionalized carbon dots

*A. Shanti Krishna, C. Radhakumary\*, and K. Sreenivasan\**

Laboratory for Polymer Analysis, Bio Medical Technology Wing,  
Sree Chitra Tirunal Institute for Medical Sciences and Technology,

Thiruvananthapuram-695012-India.

E-mail: [sreeni@sctimst.ac.in](mailto:sreeni@sctimst.ac.in), [radha.changerath@gmail.com](mailto:radha.changerath@gmail.com)

#### FIGURES

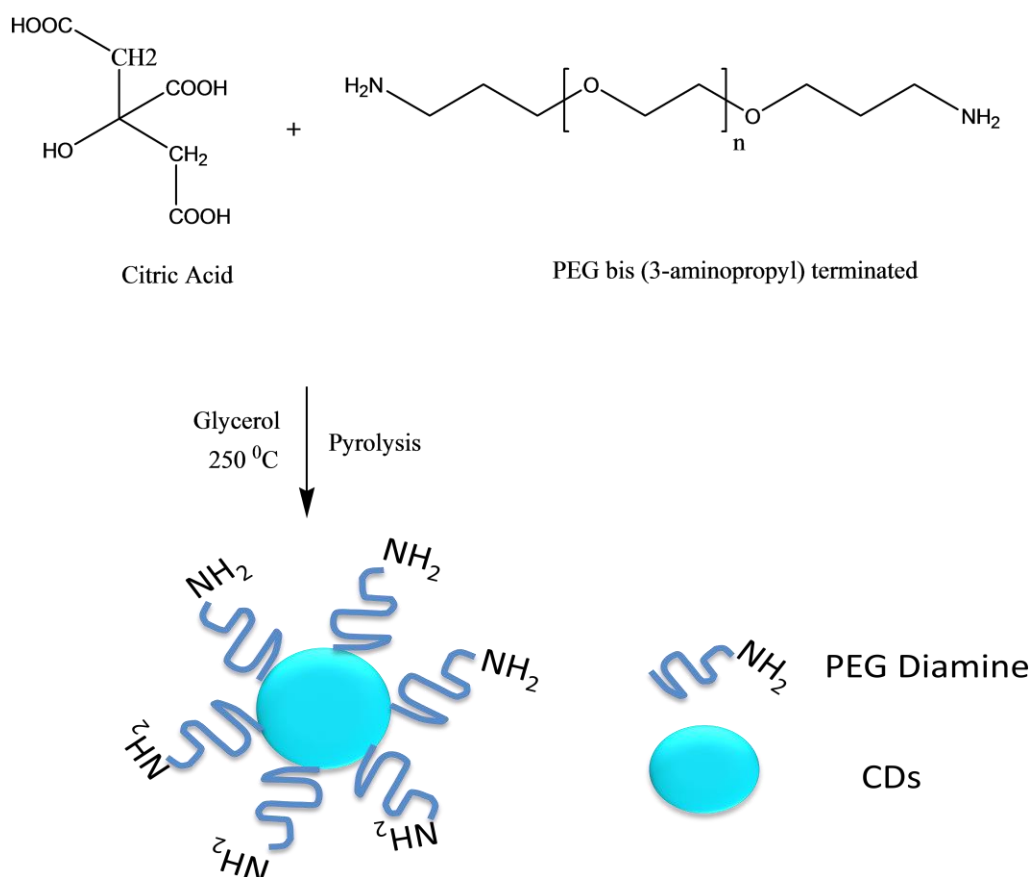

**Scheme S1: Synthetic route for the formation of CDs**

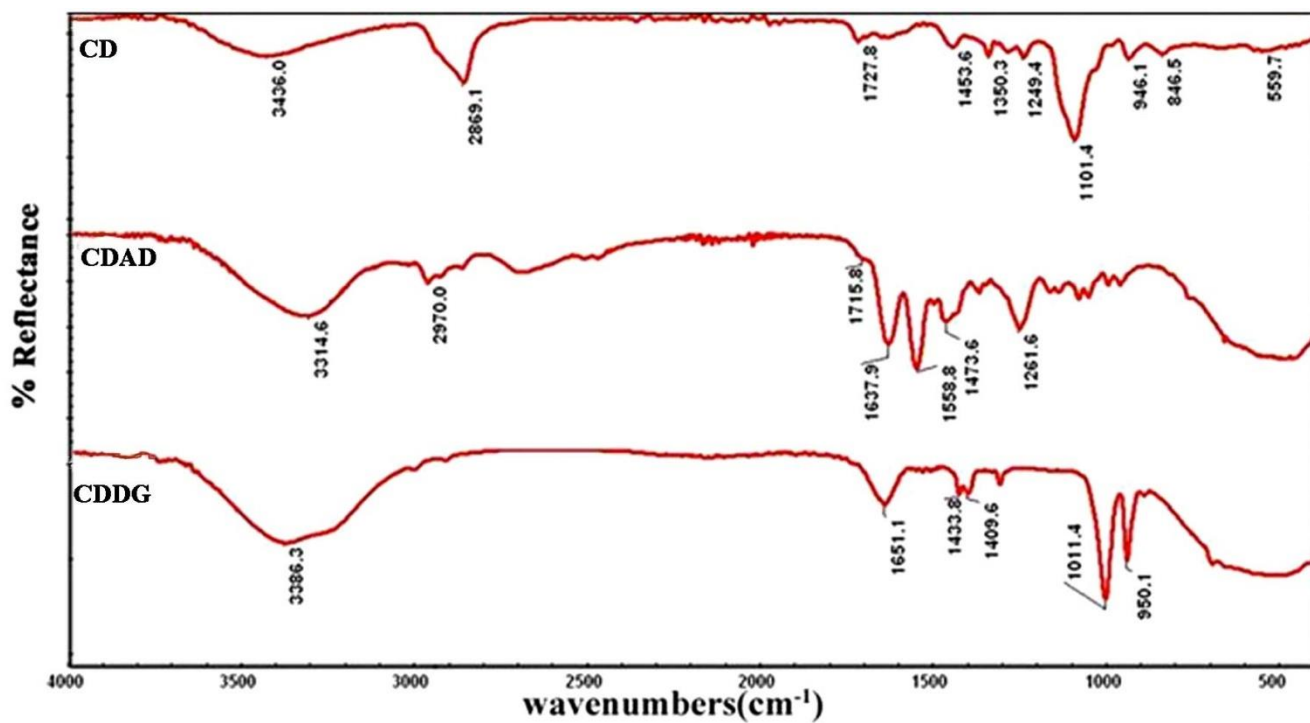

Figure S1. FTIR spectra of CD, CDAD and CDDG

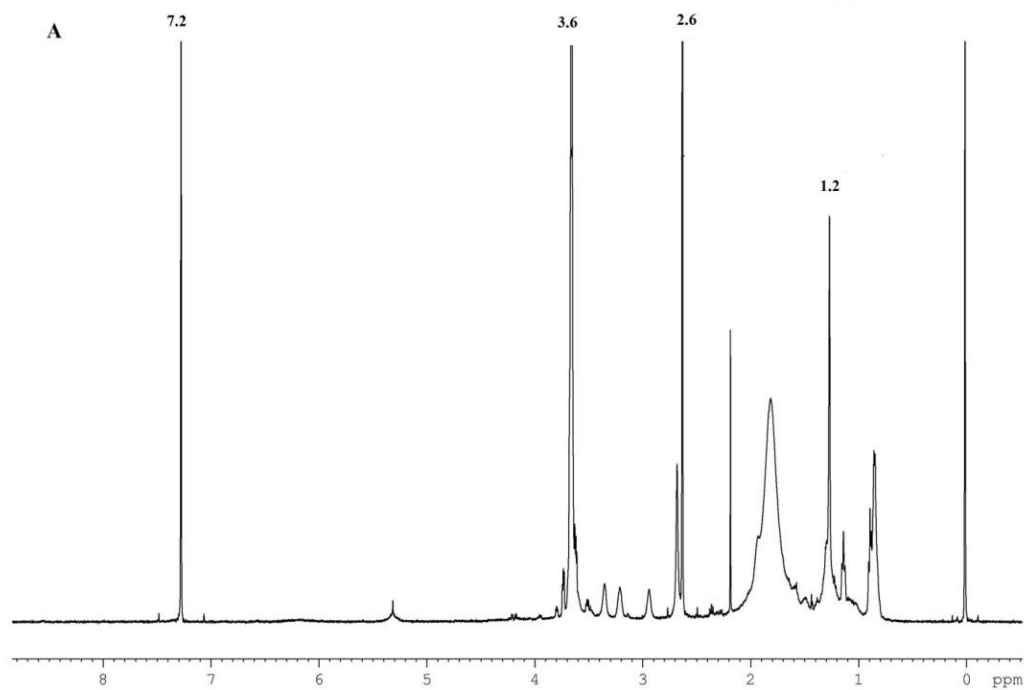

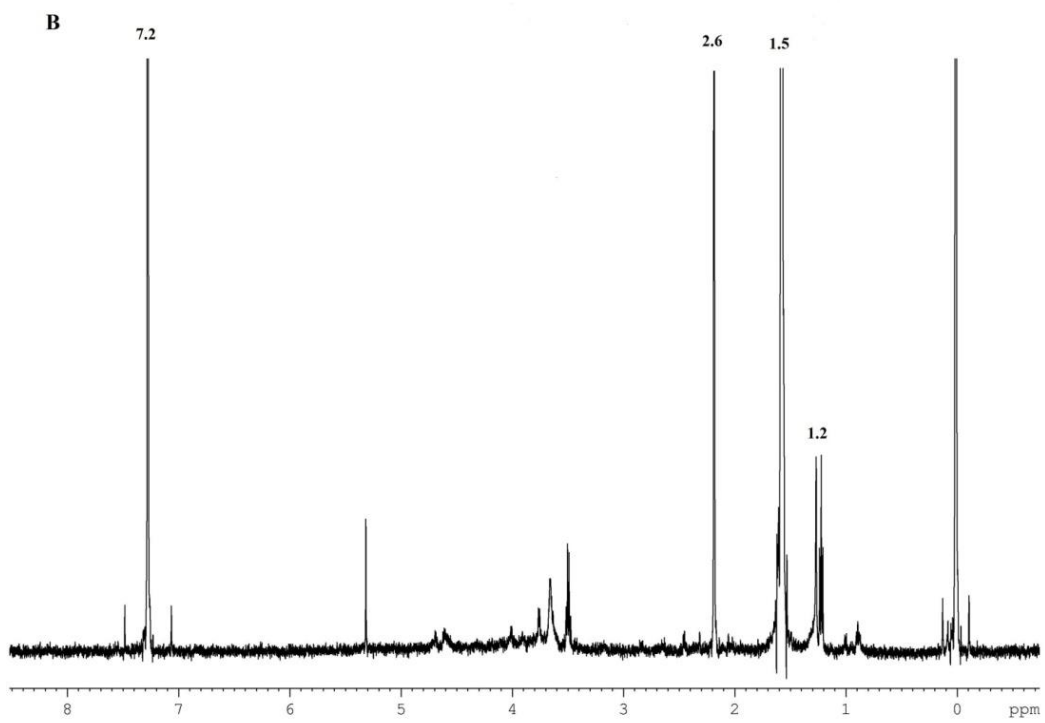

Figure S2.  $^1\text{H}$  NMR Spectra o

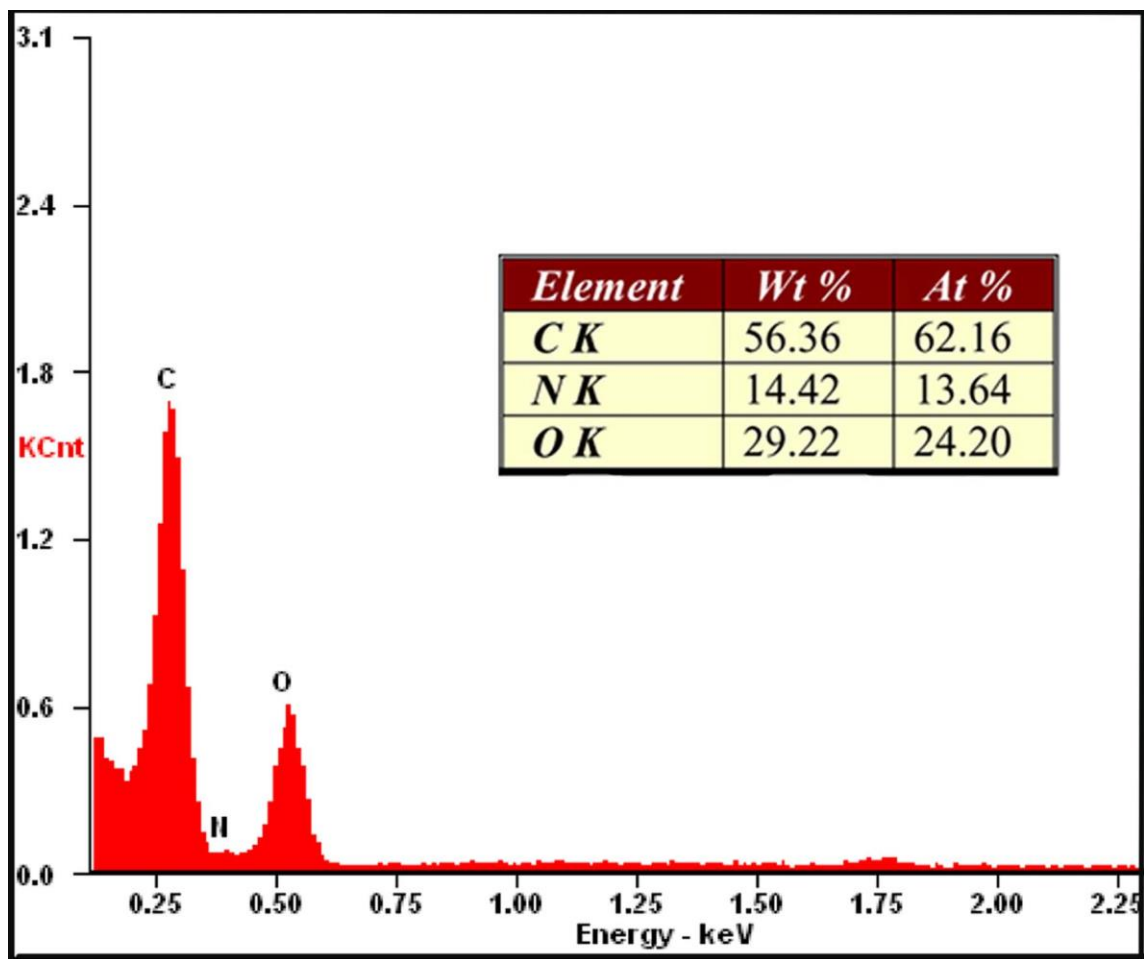

f A) CDDG B) Digitonin

Figure S3. EDAX spectrum of CDs

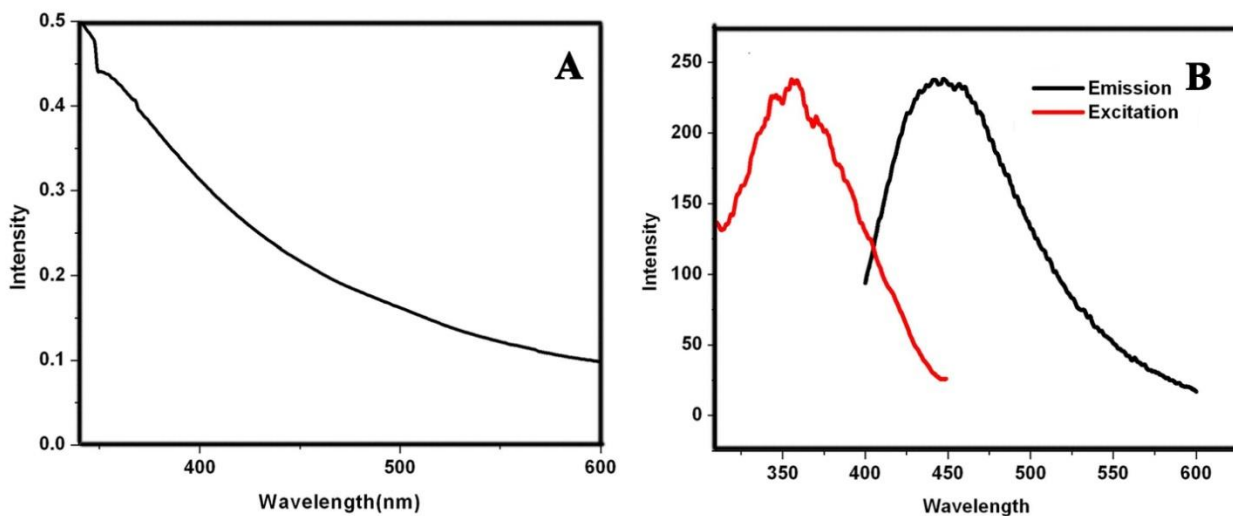

**Figure S4.** A) UV-Visible absorption spectrum of CDDG

B) Fluorescence excitation and emission spectra of CDDG

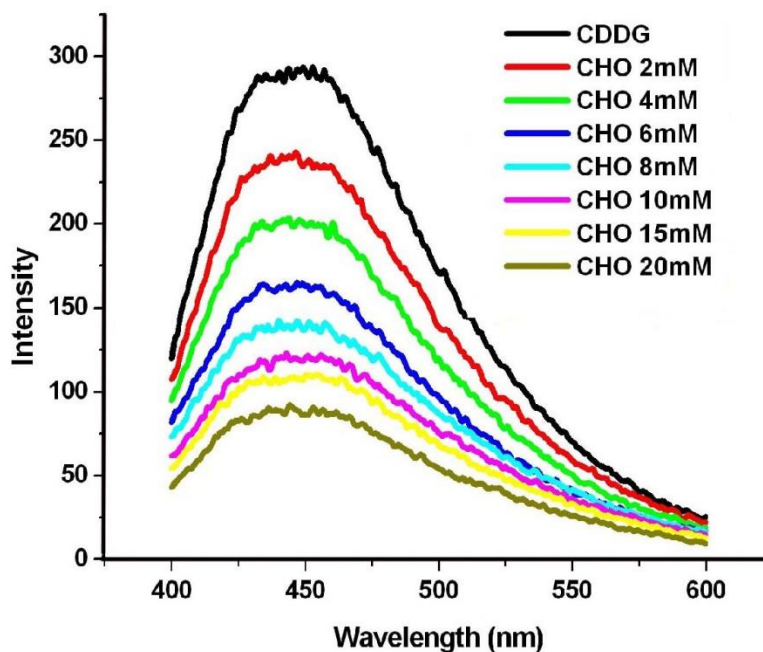

**Figure S5.** Fluorescence spectra of CDDG in presence of different concentrations of cholesterol

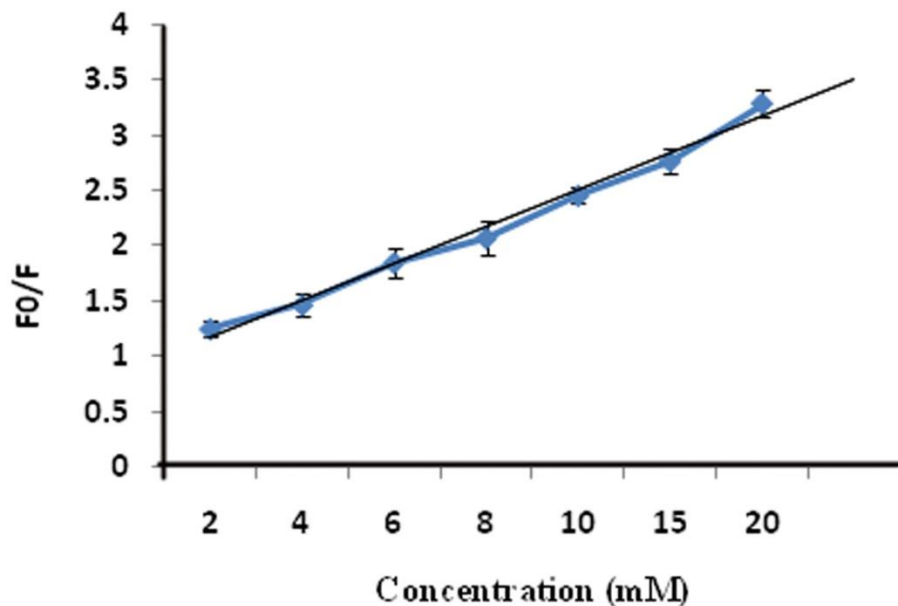

**Figure S6.** Linear relationship between the relative fluorescence intensities of CDDG and varied concentrations of cholesterol is depicted here. F<sub>0</sub> and F are the fluorescence intensities of CDDG in the absence and presence of cholesterol respectively

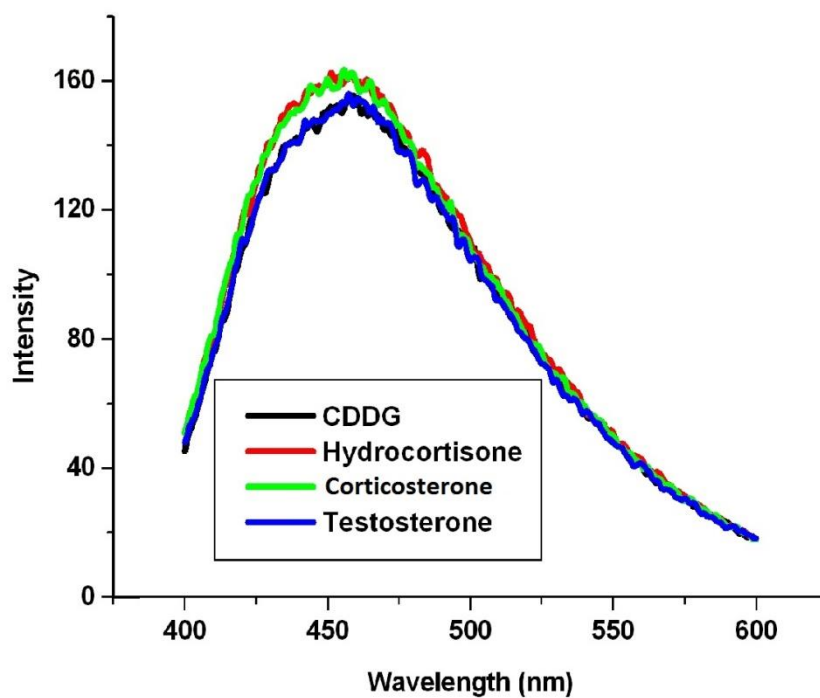

**Figure S7.** Fluorescence emission spectra of CDDG in presence of other steroids

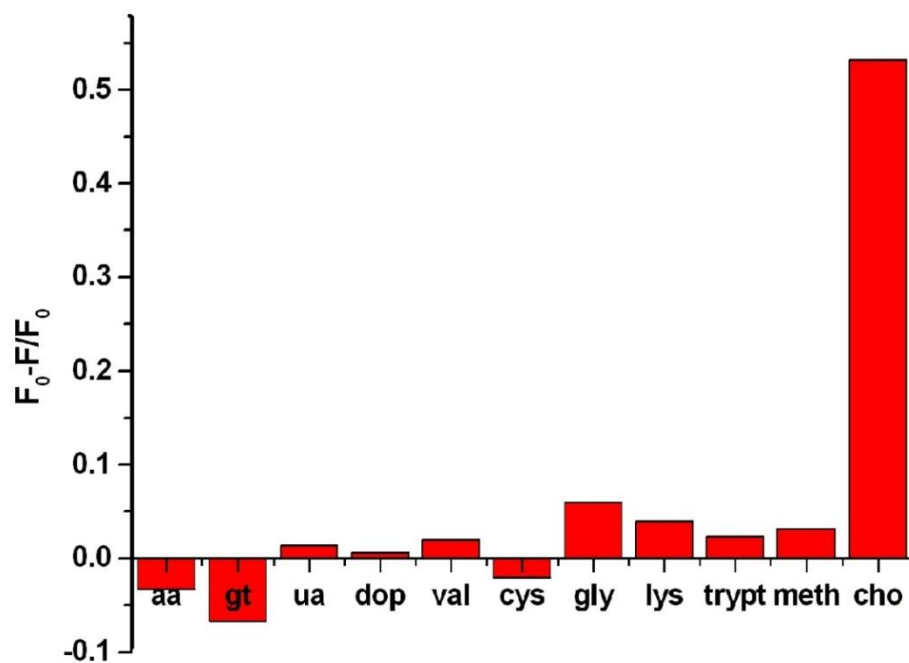

**Figure S8.** CDDG in presence of potential interfering biomolecules coexisting in serum.  $F_0$  and  $F$  are the fluorescent intensities of CDDG before and after adding the corresponding molecules respectively.

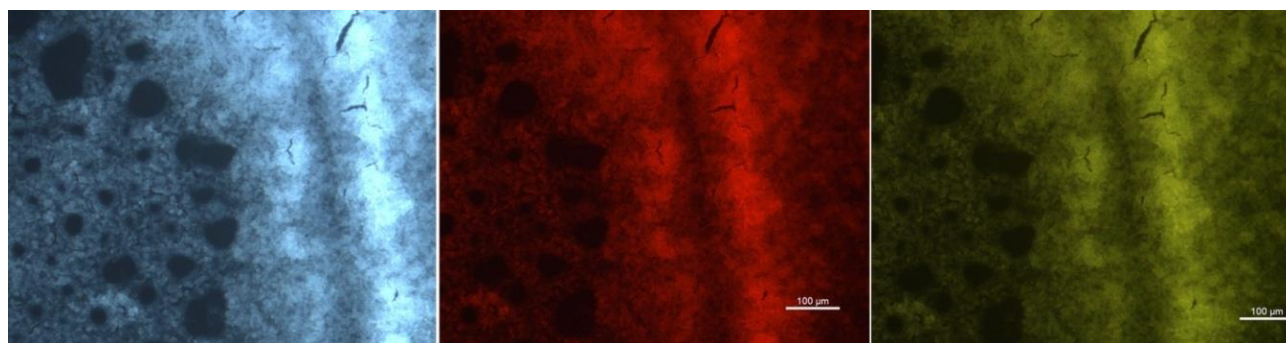

**Figure S9.** Fluorescence microscope images of cholesterol solution dried on a glass slide incubated with CDDG, at different excitations

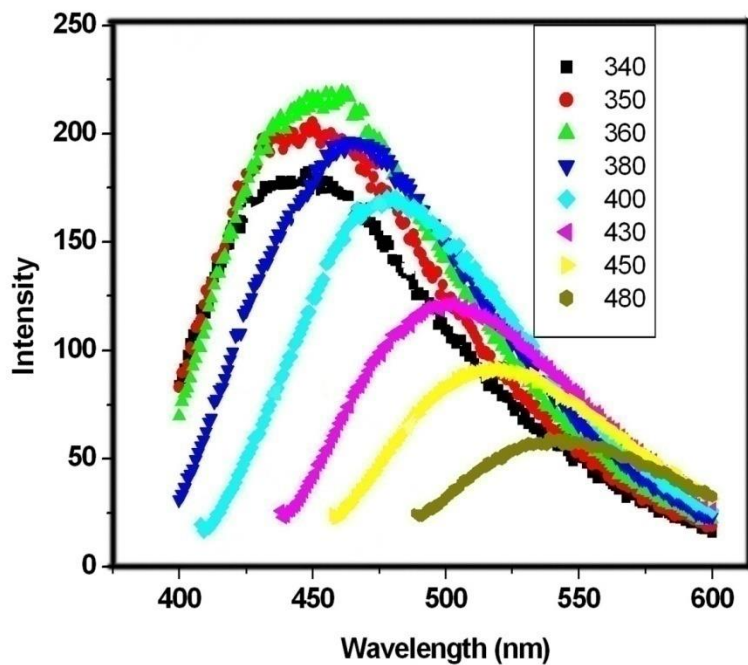

**Figure S10.** Excitation dependent emission of CDDG

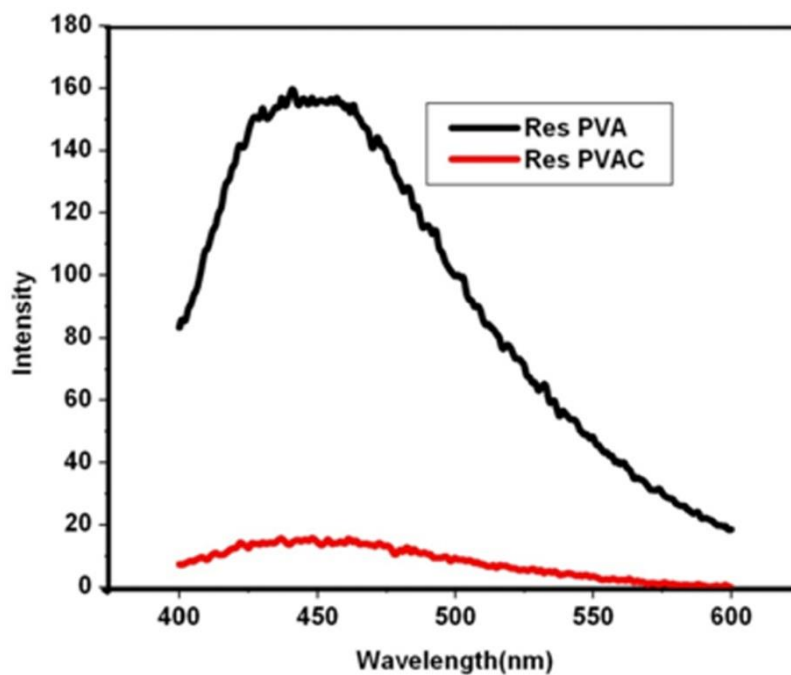

**Figure S11.** Fluorescence emission of CDDG solution after removing the incubated PVA film alone (Res PVA) and PVA film doped with cholesterol (Res PVAC)



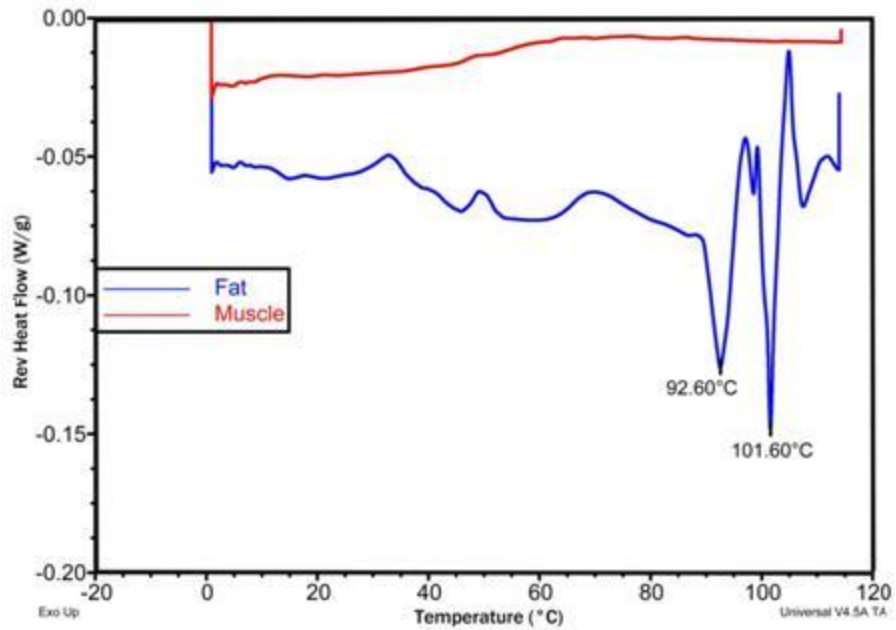

**Figure S12.** MDSC curve for the fat deposited tissue and deposit free tissue

**Table S1.** Zeta Potential values from DLS

| S.No | Sample Code | Zeta Potential (mV) |
|------|-------------|---------------------|
| 1    | CD          | -20.90              |
| 2    | CDAD        | -6.78               |
| 3    | CDDG        | -4.99               |
